# Supplementary material
Source: PubMed Central journal article supplement (PMC3670330)
Supplement: 1301820110_pnas.201301820SI.pdf [file 1301820110_pnas.201301820SI.pdf]

# Supporting Information

Jans et al. 10.1073/pnas.1301820110

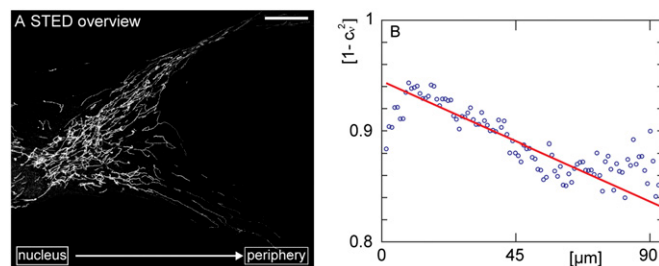

**Fig. S1.** Mitofilin cluster distribution is denser in the perinuclear mitochondria. (A) Representative primary human fibroblasts used for the analysis shown in B. The image is identical to that shown in Fig. 2A. The cell was labeled with antiserum against mitofilin and imaged with stimulated emission depletion (STED) microscopy. (B) Plot of  $[1-c_v^2]$  radiating from the center of the cell to its border. The normalized variance value,  $c_v^2$ , reflects several physical parameters, including the distribution and size of the protein clusters, cluster-to-mitochondrial background ratio, and others.  $c_v^2$  was determined as described previously (1). In brief, first the local variance of the fluorescence intensity of raw STED images was determined in round regions of interest (ROIs) with a diameter of 7 pixels ( $\sim 140$  nm). The resulting variance values were assigned to the central pixel of the analyzed ROI. To evaluate the results of the analysis independent from the absolute brightness of the structures, the individual variance values were normalized to the squared average fluorescence intensity of the respective ROI, giving the  $c_v^2$  values. The variance calculation was repeated using each pixel successively as an ROI center, resulting in an image in which each pixel represents the local normalized variance. The mitochondria-containing fraction of the image was selected by image segmentation using masks. Finally, the  $[1-c_v^2]$  values were plotted against the distance from the nucleus. Blue circles indicate 100 bins that pool  $\sim 9 \times 10^5$  individual  $[1-c_v^2]$  values. The red line is the linear fit based on the individual  $[1-c_v^2]$  values. The negative slope of the curve indicates that the density of the mitofilin cluster distribution is greater in mitochondria around the nucleus.

1. Wurm CA, et al. (2011) Nanoscale distribution of mitochondrial import receptor Tom20 is adjusted to cellular conditions and exhibits an inner-cellular gradient. *Proc Natl Acad Sci USA* 108(33):13546–13551.
